# Supplementary material for: Feasibility of Standardized Procedures of White Light Gastroscopy for Clinical Practice: A Multiple Center Study in China
Source: Research Square preprint supplement (doi:10.21203/rs.3.rs-228187/v1), 2021-02-24
Supplement: Supplementary file 1 [file 47b7518b26d4296781340a39.docx]

Table 2. Eating habits of patients of the base-line group and standardized procedure group

| Freshvegetables | Base-line group (%) | Standardized procedure group (%) | P value |
| --- | --- | --- | --- |
| Freshvegetables |  |  | 0.211 |
| Never | 1.2 | 0.7 |  |
| <3-4 times/week | 11.2 | 13.4 |  |
| 3-4 times/week | 42.2 | 38.9 |  |
| >5-7 times/week | 45.3 | 47.0 |  |
| Pickled foods |  |  | 0.612 |
| Never | 7.0 | 14.5 |  |
| <3-4 times/week | 75.5 | 66.2 |  |
| 3-4 times/week | 13.2 | 15.3 |  |
| >5-7 times/week | 4.3 | 4.0 |  |
