# Supplementary material for: Feasibility of Standardized Procedures of White Light Gastroscopy for Clinical Practice: A Multiple Center Study in China
Source: Research Square preprint supplement (doi:10.21203/rs.3.rs-228187/v1), 2021-02-24
Supplement: Supplementary file 7 [file 529760cb784235e869a1dfbb.docx]

Table 4. Gastric lesions detected in the base-line group and standardized procedure group

|  | | Base-line group | Standardized procedure group | P value |
| --- | --- | --- | --- | --- |
| N | | 1051 | 2156 |  |
| Detection rate of gastric lesions | | 38.4% (404) | 52.5% (1132) | <0.001 |
| Noncancerous lesions | Simple inflammation | 222 (21.1%) | 431 (20.0%) | 0.455 |
| Intestinal metaplasia | 159 (15.1%) | 360 (16.7%) | 0.257 |
| LGIN | 4 (0.4%) | 17 (0.8%) | 0.179 |
| Cancerous lesions | EGC | 2 (0.2%) | 8 (0.4%) | 0.514 |
| AGC | 12 (1.1%) | 14 (0.6%) | 0.144 |
| Early gastric cancer rate | 14.3% | 36.4% | 0.255 |

LGIN: low-grade intraepithelial neoplasia; EGC: early gastric cancer, including high-grade intraepithelial neoplasia and tumor confined to the mucosa or submucosa (T1);AGC: advanced gastric cancer
