# Supplementary material for: Feasibility of Standardized Procedures of White Light Gastroscopy for Clinical Practice: A Multiple Center Study in China
Source: Research Square preprint supplement (doi:10.21203/rs.3.rs-228187/v1), 2021-02-24
Supplement: Supplementary file 8 [file 6cf0dae8b294c6b26c923a44.docx]

Table 3. Duration and picture number in endoscopy procedure of the base-line group and standardized procedure group

|  | Base-line group | Standardized procedure group | P value |
| --- | --- | --- | --- |
| N | 1051 | 2156 |  |
| Median duration（s） | 395.0 ±172.4 | 455.3 ± 188.9 | 0.003 |
| Picture number | 21.3 ± 6.0 | 38.2 ± 6.9 | <0.001 |
