# Supplementary material for: Feasibility of Standardized Procedures of White Light Gastroscopy for Clinical Practice: A Multiple Center Study in China
Source: Research Square preprint supplement (doi:10.21203/rs.3.rs-228187/v1), 2021-02-24
Supplement: Supplementary file 9 [file 701e8f0981297949271a1b84.docx]

Table 1. Clinical features of patients of the base-line group and standardized procedure group

| Clinical features | Base-line group | Standardized procedure group | P value |
| --- | --- | --- | --- |
| N | 1051 | 2156 |  |
| Sex M:F | 1：1.4 | 1：1.2 | 0.379 |
| Age | 56.0±9.5 | 55.8±9.1 | 0.677 |
| Family history of gastric cancer | 11.0% | 11.9% | 0.709 |
| Epigastric pain | 41.4% | 36.6% | 0.184 |
| Heartburn | 40.8% | 34.1% | 0.056 |
| Dysphagia | 15.0% | 13.6% | 0.585 |
| Weight loss | 29.3% | 26.2% | 0.337 |
| Melena | 8.6% | 6.4% | 0.230 |
| Fecal occult blood positive | 9.4% | 6.1% | 0.077 |
