# Supplementary material for: Feasibility of Standardized Procedures of White Light Gastroscopy for Clinical Practice: A Multiple Center Study in China
Source: Research Square preprint supplement (doi:10.21203/rs.3.rs-228187/v1), 2021-02-24
Supplement: Supplementary file 10 [file aed9390d4f05bcbe21ed44d0.docx]

Table 6. Endoscopist satisfaction scores in the base-line group and standardized procedure group

|  | Base-line group | Standardized procedure group | P value |
| --- | --- | --- | --- |
| N | 1051 | 2156 |  |
| General impression of operation | 3.91 ± 0.55 | 4.39 ± 0.59 | <0.001 |
| Patient coordination | 3.82 ± 0.70 | 4.41 ± 0.63 | <0.001 |
| Preparation before endoscopy | 3.87 ± 0.59 | 4.57 ± 0.56 | <0.001 |
| Mucus residual | 3.62 ± 0.76 | 4.55 ± 0.68 | <0.001 |
| Froth residual | 3.66 ± 0.67 | 4.56 ± 0.60 | <0.001 |
| Operation time | 3.78 ± 0.66 | 4.42 ± 0.69 | <0.001 |
| Taken pictures | 3.97 ± 0.37 | 4.36 ± 0.53 | <0.001 |
| Lesion observation | 3.71 ± 0.60 | 4.38 ± 0.60 | <0.001 |
